## RETRACTION

# Retraction: Alleviation of temperature stress in maize by integration of foliar applied growth promoting substances and sowing dates

The *PLOS ONE* Editors

The *PLOS ONE* Editors retract this article [1] because it was identified as one of a series of submissions for which we have concerns about authorship, competing interests, and peer review. We regret that the issues were not addressed prior to the article's publication.

IA, SI, TJ, AT, MK, QS, KM, and MHS did not agree with the retraction. HMA either did not respond directly or could not be reached.

## Reference

1. Afzal I, Imran S, Javed T, Tahir A, Kamran M, Shakeel Q, et al. (2022) Alleviation of temperature stress in maize by integration of foliar applied growth promoting substances and sowing dates. *PLoS ONE* 17(1): e0260916. <https://doi.org/10.1371/journal.pone.0260916> PMID: 35051214

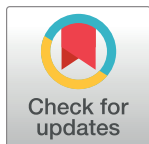

## OPEN ACCESS

**Citation:** The *PLOS ONE* Editors (2022) Retraction: Alleviation of temperature stress in maize by integration of foliar applied growth promoting substances and sowing dates. *PLoS ONE* 17(8): e0272404. <https://doi.org/10.1371/journal.pone.0272404>

**Published:** August 17, 2022

**Copyright:** © 2022 The PLOS ONE Editors. This is an open access article distributed under the terms of the [Creative Commons Attribution License](https://creativecommons.org/licenses/by/4.0/), which permits unrestricted use, distribution, and reproduction in any medium, provided the original author and source are credited.
